# Supplementary material for: Identifying the seeding signature in cloud particles from hydrometeor residuals
Source: Copernicus journal article supplement (doi:10.5194/amt-2023-171), 2023-09-19
Supplement: Supplementary file 1 [file amt-2023-171-supplement.pdf]

1 **Supplementary material**

2 Identifying the seeding signature in cloud particles from hydrometeor  
3 residuals

4 Mahen Konwar<sup>1\*</sup>, Benjamin Werden<sup>2</sup>, Edward C. Fortner<sup>2</sup>, Sudarsan Bera<sup>1</sup>, Mercy Varghese<sup>1</sup>,  
5 Subharthi Chowdhuri<sup>1,&</sup>, Kurt Hibert<sup>3</sup>, Philip Croteau<sup>2</sup>, John Jayne<sup>2</sup>, Manjula Canagaratna<sup>2</sup>,  
6 Neelam Malap<sup>1</sup>, Sandeep J.<sup>1</sup>, S. A. Dixit<sup>1</sup>, Palani Murugavel<sup>1</sup>, Duncan Axisa<sup>4</sup>, Darrel  
7 Baumgardner<sup>5</sup>, Peter F. DeCarlo<sup>6</sup>, Doug Worsnop<sup>2</sup>, and Thara Prabhakaran<sup>1</sup>

8 <sup>1</sup> Indian Institute of Tropical Meteorology, Ministry of Earth Sciences, Pune, India 411008

9 <sup>2</sup>Aerodyne Research Inc., Billerica, MA, USA, 01821

10 <sup>3</sup>Weather Modification Inc., Fargo, ND, USA, 58102

11 <sup>4</sup>Center for Western Weather and Water Extremes, Scripps Institution of Oceanography, La  
12 Jolla, CA 92037, USA

13 <sup>5</sup> Droplet Measurement Technologies, Longmont, CO, USA, 80503

14 <sup>6</sup>Department of Environmental Health and Engineering, Johns Hopkins University, Baltimore,  
15 MD USA 21218

16 <sup>&</sup>now at University of California, Irvine, CA 92697-2700, USA

17

18

19

20

21

22

23

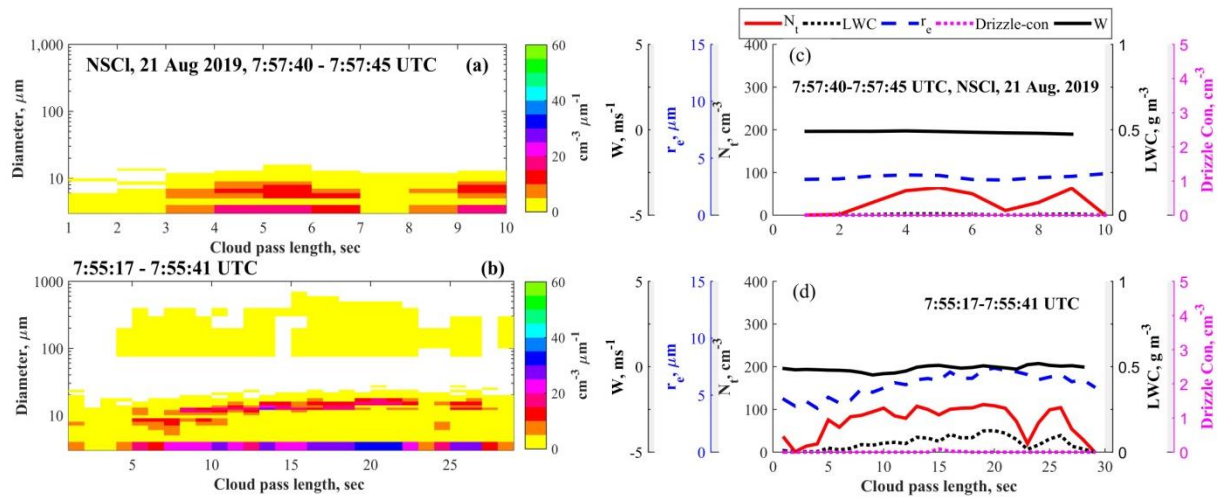

24

25 **Figure S1.** Drop size distribution for non-seeded cloud (NSCI) on 21 August 2019. The effective  
 26 radius ( $r_e$ ,  $\mu\text{m}$ ), vertical velocity ( $W$ ,  $\text{ms}^{-1}$ ), total droplet number concentrations ( $N_t$ ,  $\text{cm}^{-3}$ ) in the  
 27 diameter range 2-50  $\mu\text{m}$ , and drizzle concentration (Drizzle con,  $\text{cm}^{-3}$ ) in the diameter range 100-  
 28 6200  $\mu\text{m}$ , and liquid water content (LWC) are shown for cloud passes.

29

30

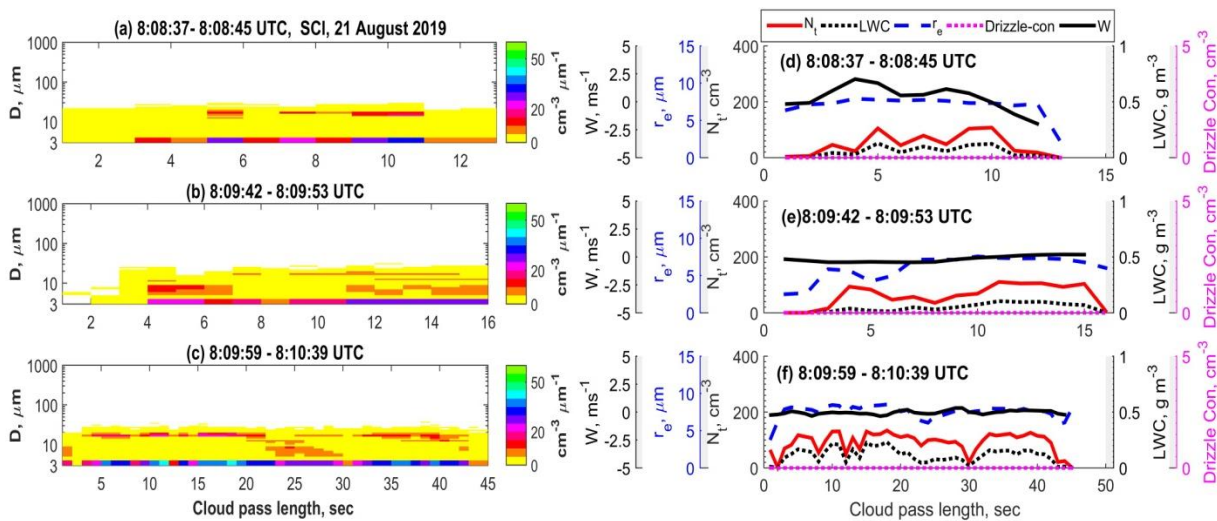

31

32 **Figure S2.** Same as Figure S1, but for seeded cloud on 21 August 2019.

33

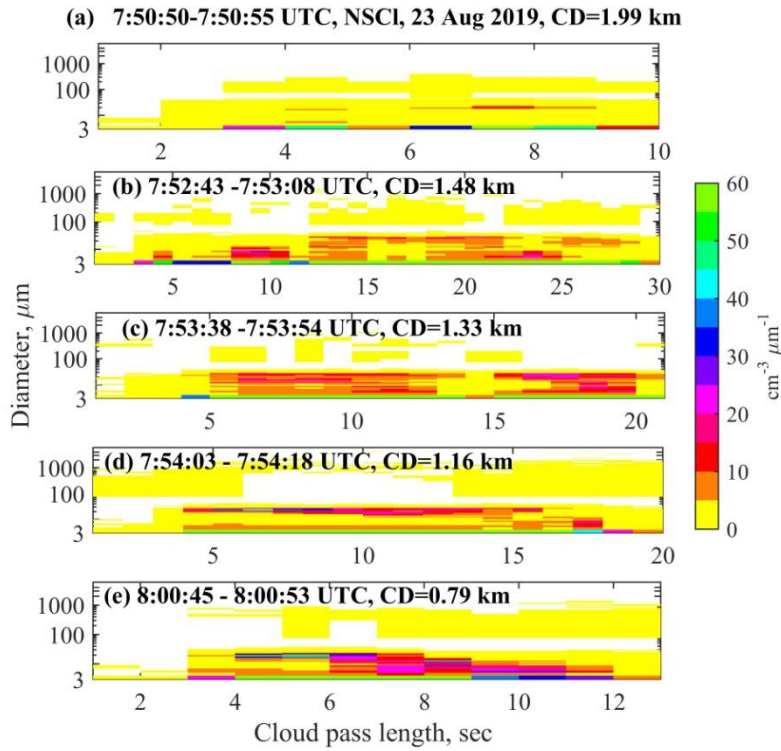

34

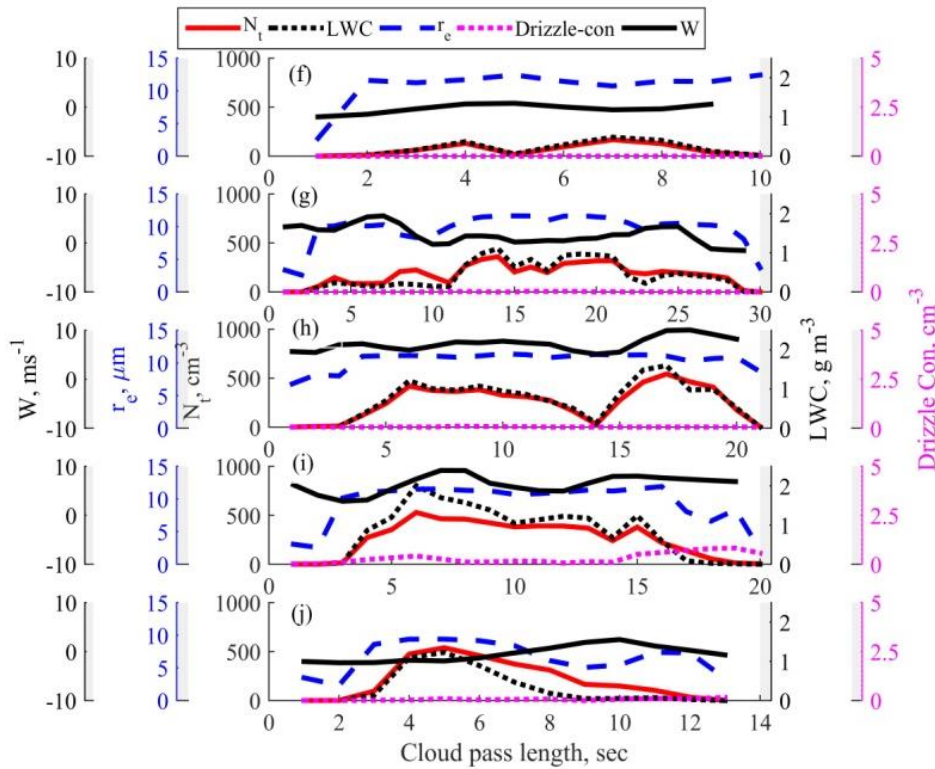

35

36

37 **Figure S3.** Same as Figure S1 but for NSCI on 23 Aug 2019.

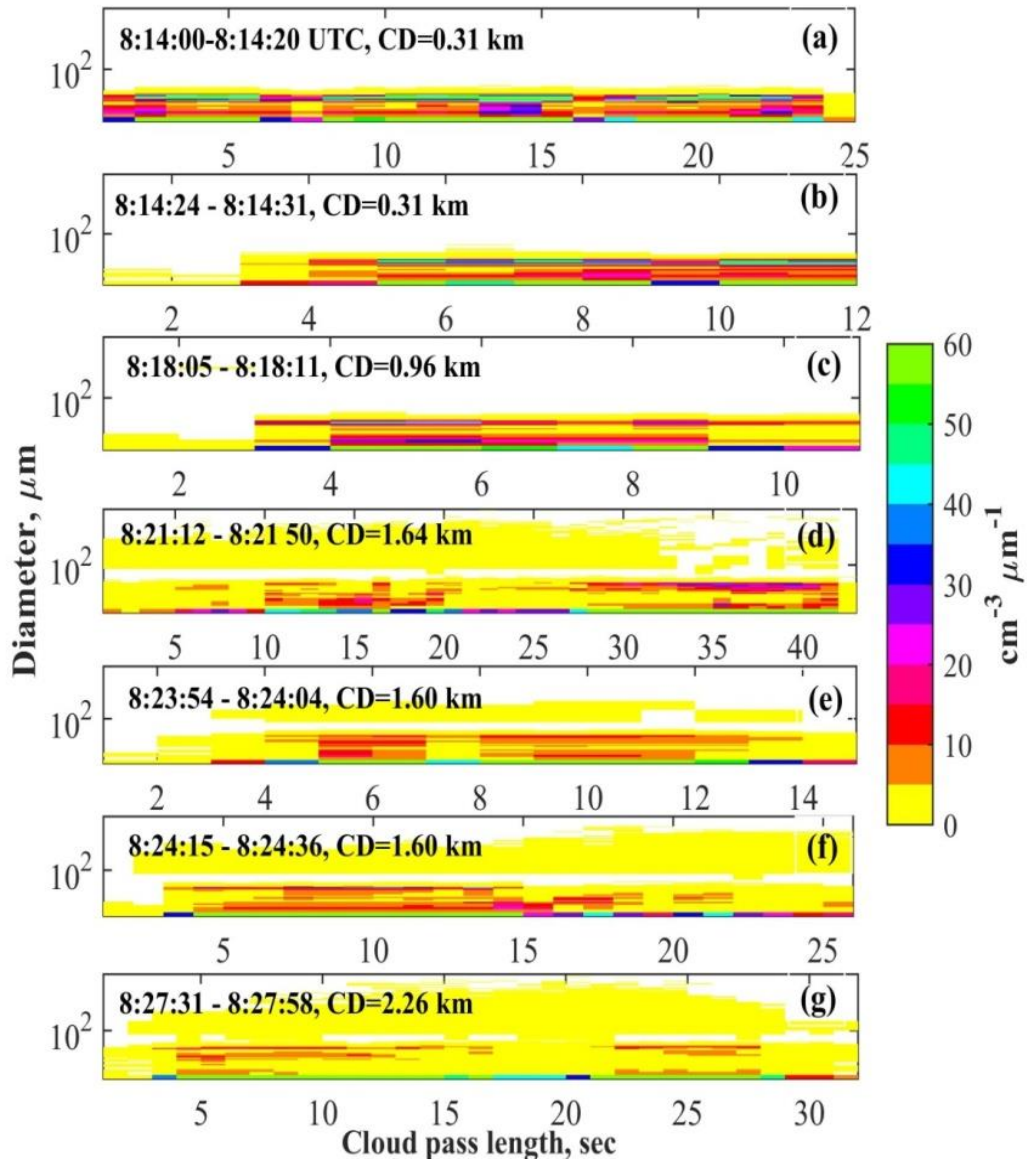

38  
39

40  
41

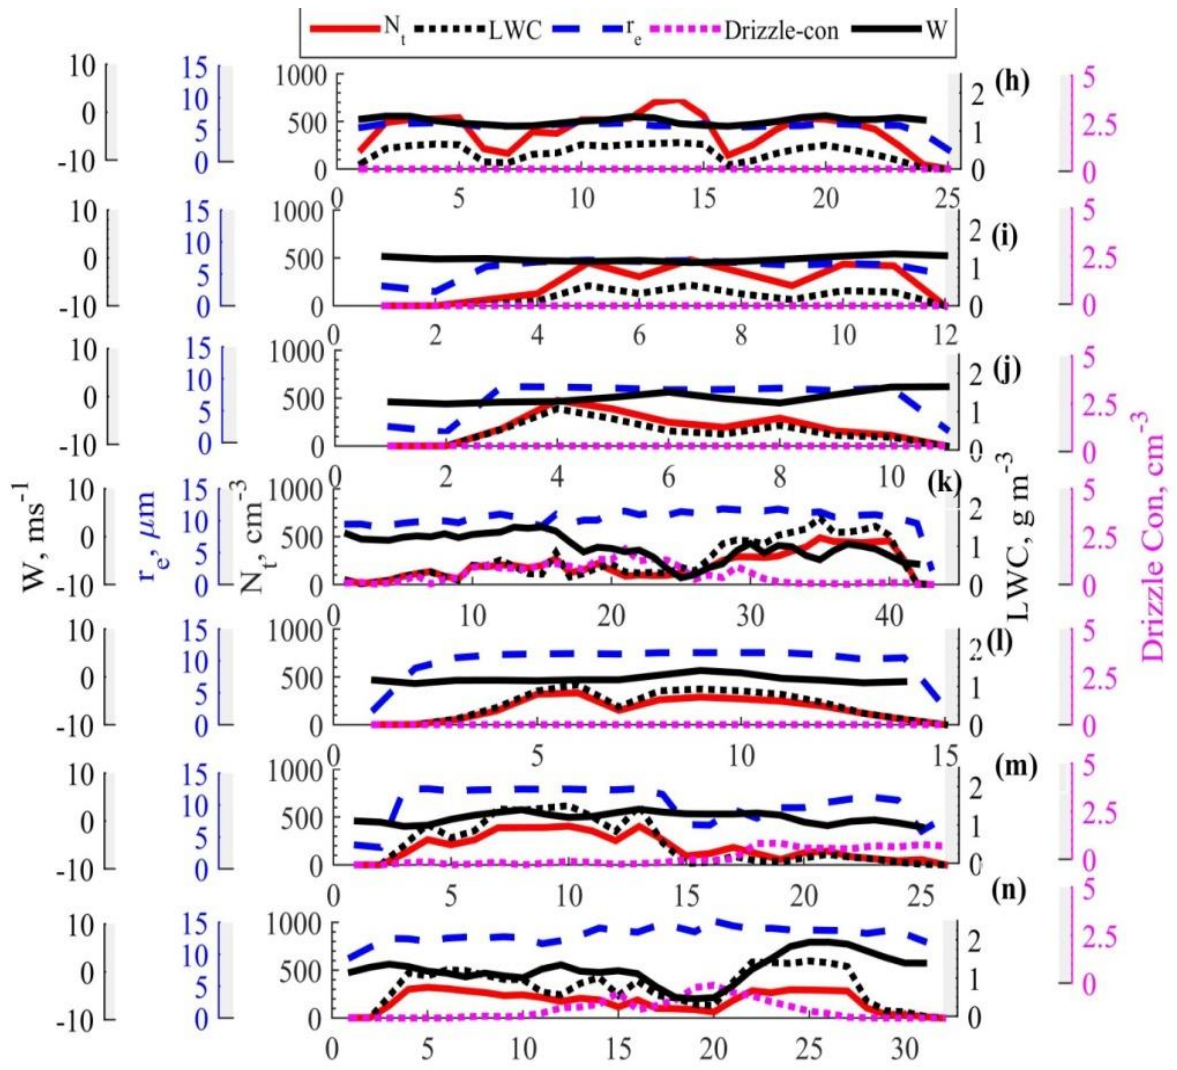

42  
 43  
 44  
 45  
 46  
 47

**Figure S4.** Same as Figure S1 but for SCl on 23 Aug 2019.

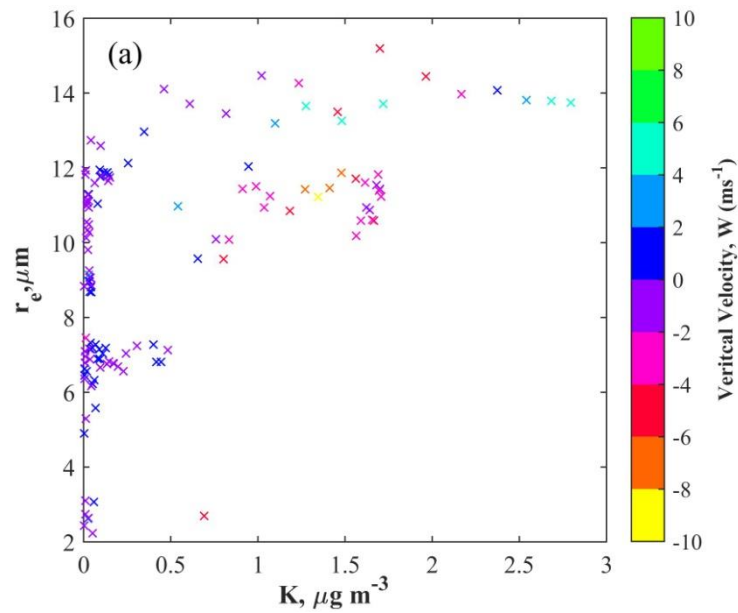

48

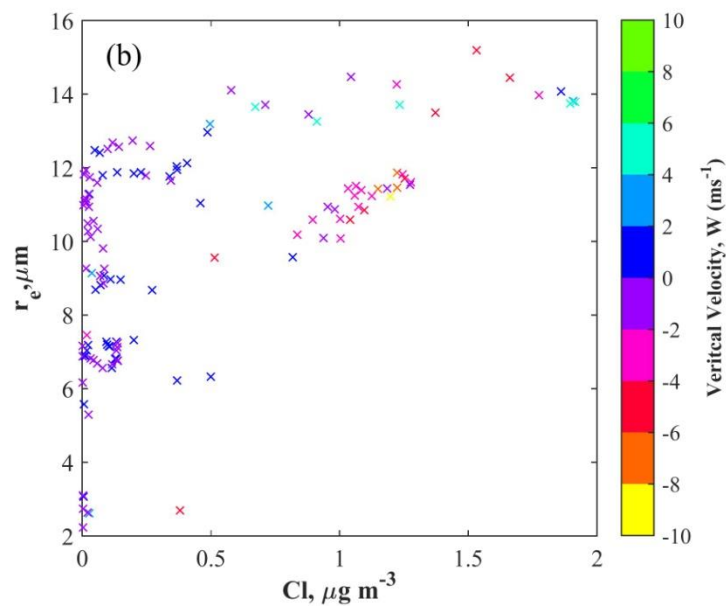

49

50

51

52

53 **Figure S5.** Scatter plot between (a) Effective radius ( $r_e$ ,  $\mu\text{m}$ ) and  $K$  ( $\mu\text{g m}^{-3}$ ), and (b)  $r_e$  versus ( $r_e$ ,

54  $\mu\text{m}$ ) and  $Cl$  ( $\mu\text{g m}^{-3}$ ). The colorbar indicates vertical velocity. -ve values indicate updrafts while

55 +ve values indicate downdrafts.

56

57

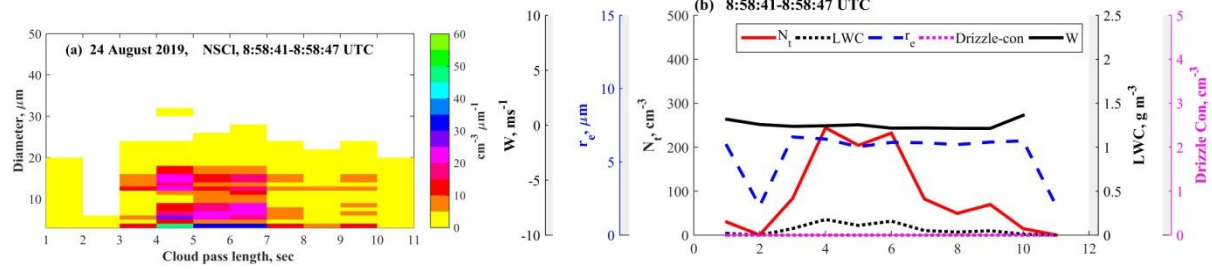

58  
 59 **Figure S6.** Same as Figure S1 but for NSCI on 24 Aug 2019. The measurement is above cloud  
 60 base.

61

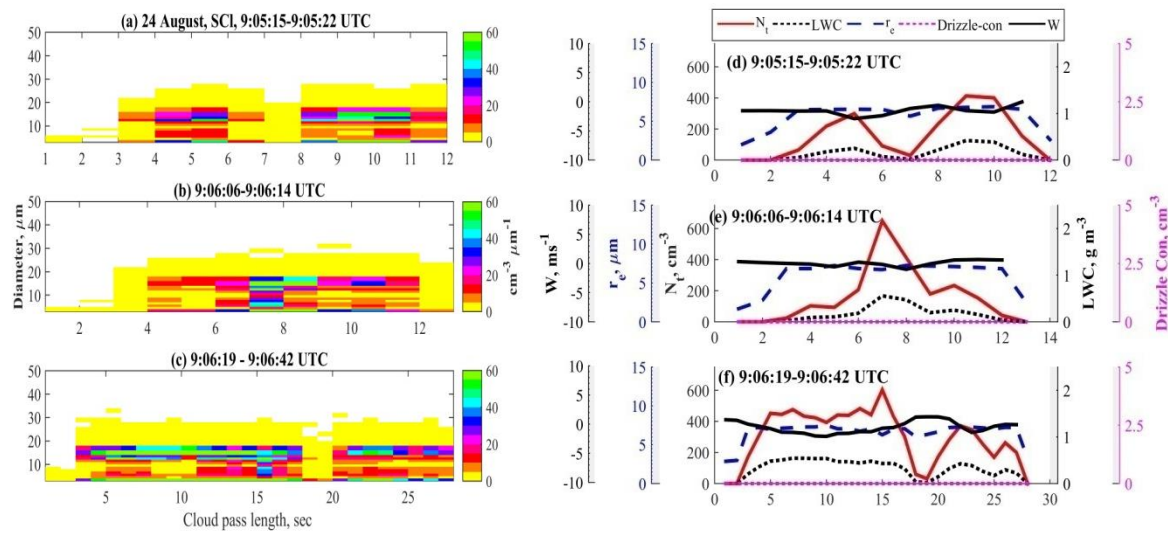

62  
 63  
 64  
 65 **Figure S7.** Same as Figure S1 but for SCl on 24 Aug 2019. The measurement is above cloud  
 66 base.

67

68

69

70

71
