# Supplementary material for: Identifying the seeding signature in cloud particles from hydrometeor residuals
Source: Copernicus journal article supplement (doi:10.5194/amt-2023-171), 2023-09-19
Supplement: Supplementary file [file amt-2023-171-RC2-supplement.pdf]

## Review of 'Identifying the seeding signature in cloud particles from hydrometeor residuals'

Konwar et al.

AMT-2023-171

### Summary

In this manuscript, the authors present airborne measurements from a mini-Aerosol Mass Spectrometer (mAMS) to identify regions in cloud that may have been influenced by cloud seeding. Following sampling using a counter flow virtual impactor (CVI) that removes hydrometeors and other aerosol with aerodynamic diameters smaller than a certain size ( $\sim 7 \mu\text{m}$  in this study), cloud droplets are evaporated and the residual aerosol are tested for the presence of chemical species, including potassium (K) and Chlorine (Cl) that are otherwise not present (or not detectable in natural form) within the natural cloud environment. The authors (correctly) state that unambiguously identifying cloudy regions in which seeding material is contained within hydrometeors remains elusive; and developing a method to identify such regions is a key step to evaluating hypotheses associated with how cloud seeding might impact cloud and precipitation evolution. In this manuscript, the authors present evidence that they are able to do just that, and thus I believe this work makes an important contribution and is therefore worthy of publication. However, there are numerous points (some major) that I feel the authors need to address before publication.

In the first case study (case I, on Aug 21); the authors obtain measurements upwind in a stratus cloud and follow that with a release of seeding material a bit downwind, which is again followed with additional passes downwind to measure the cloud after seeding. The data shown in Figure 5 (b and c) indicate that most of the measurements downwind of the seeding release show elevated K and Cl. That is somewhat counter to what I would expect. The seeding material should disperse downwind in a slantwise pattern...similar to that shown in Tessendorf et al (2019; BAMS) and other references coming out of SNOWIE. Thus, when flying the 3 passes downwind in this case, I would expect the aircraft to fly through a brief line (region) containing seeding material surround by most of those legs being outside of regions containing seeding material. The authors could develop a simple advection model utilizing the mean wind speed and the time of the release along the seeding leg to estimate how the seeding line advects downwind. That would then provide an estimate of where to (and where not to) expect the presence of seeding material in the cloud.

That the authors are able to detect the presence of K and Cl is exciting, however, I think the onus is on them to prove that it is related specifically to the region that contains seeding material. My gut instinct is that it indeed is identifying those regions, but I am still a bit concerned based on the measurements provided in figure 5 as I describe in the above paragraph, that the method 'over-identifies' regions containing seeding material. I also wonder, since the same aircraft is used for releasing seeding material and making measurements; is there any potential for contamination? Were any experiments conducted where NSCI was re-sampled upwind following the release of seeding material?

### Major Comments

1. Introduction—I think the introduction could be stronger. For example, in the second and third paragraphs the authors discuss the use of tracer materials to identify how researcher might understand the transport of seeding material through clouds. They describe two technologies previously used (chaff and chemical tracer such as SF<sub>6</sub>); while describing downsides of both, I think they miss the main point that *neither of those methods* would allow investigators to determine if seeding material actually makes it into cloud hydrometeors. This is touched on around line 85 ('can changes in cloud microphysical processing be linked to seeding materials'); in order for this to happen, the seeding material must actually interact with hydrometeors. The method developed in this manuscript does exactly that, by sampling residuals from cloud droplets. The author's should highlight this
2. Lines 131 – 139; and Table 1: Measurements of Cloud properties. The authors need some additional discussion on uncertainties in their measurements. These should come from published literature and simply referencing the manufacturer website is not sufficient. For example, the CDP provides a measurement/estimate of the size distribution, but there are uncertainties associated both with counting (though likely small) and sizing (which could be significant in some size bins)...these errors/uncertainties can lead to further (and much larger) uncertainties in integrated quantities such as liquid water content. The authors use LWC as a threshold in this study to identify regions less likely to be impacted by entrainment/mixing; thus having a discussion of potential errors in this measurement is important.
3. It appears that in the three cases presented, the authors knew well the cloud base conditions. Lines 144-5; the authors describe a threshold method to identify parcels that are either not or only slightly diluted. Why use LWC\_max rather than LWC\_ad? A threshold of  $0.75 * LWC_{max}$  could be a highly diluted if the maximum LWC during that penetration is significantly less than the adiabatic value. Using adiabatic can be a direct estimate of 'how diluted' a parcel may be.
4. Specific for Seed Case i: Fig 5, Table 3, and paragraph contained in lines 329-343 – Several questions come up when I look at the presentation of this case: How are the in-cloud times selected for which dots are represented in figs 5b and 5c? I don't think I'd call these 'profiles' in fig 5 b & c because all these downwind (SCI) passes are at one level and the NSCI pass is at a slightly higher level. I understand wanting a consistency in figure style between this case and the other two; but presenting this case in this style doesn't make sense to me. The data in table 3 indicates that one of the NSCI cases in this case had a LWC of  $0.003 \pm 0.003$  – this seems marginal as a cloud to me; less than 0.01 LWC is below what most would consider in cloud. It seems odd to include data such as this as a comparison of cloud? LWCs are generally higher after seeding (although the measurements are lower in cloud...why? Seeding should not result in increased condensed water, but rather just changes in how that condensed water is distributed across hydrometeor distributions. On line 340 the authors suggest that increase in mid-

sized droplet concentration may be due to collection, but this does not make sense...these droplets are <20 um; collection is extremely inefficient at these.

5. For Seed Case ii: In Fig 6 b and c – Need a better way to differentiate between which dots represent NSCI and which represent SCI – perhaps shape? One could be square—the other circle? Line 392 – the authors claim that after seeding Nt increased at lower altitudes—I disagree. The lowest altitude above cloud base sampled before seeding was 0.8 km and after seeding was 0.3 km – these two cannot be compared---the so seed is more than twice the distance above cloud base. Further, in the after seeding case, a pass was made at 0.96 km, and that contained lower concentrations than the no seed at 0.8 km. The authors need more rigor in their data analysis before making such claims. On line 398 the authors claim that large standard deviations in re are likely the result of entrainment/mixing with dry air....I agree; but then they need to be more rigorous in trying to eliminate regions which are influenced by mixing in their analysis. This is a possible indicator that their threshold of  $0.75 * LWC\_max$  is not sufficient to do accomplish this. On line 412 the authors suggest that because drizzle is encountered after seeding and not before that the production of drizzle can be attributed to seeding...while this is one possibility, there are many other possibilities that could account for that. Different stages of lifecycle, pre-conditioning of the environment, etc are all possibilities. Studies of cumulus continually show that drizzle may form at the same levels in a cumulus cluster that indicated no drizzle development several minutes earlier.
6. For Seed Case iii: Why is the LWC 3-5 times higher after seeding than before, when observations were made at the same level above cloud base? One possibility is that these difference are due solely to difference in amount of dry air mixed into parcels that were sampled, and any differences in microphysics may be attributed to that rather than to seeding?

### Specific Comments

1. Abstract, Line 31 – ....attempts to link precipitation enhancement....remained inclusive? Not sure what is meant by this, could it be the authors mean that attempts remained elusive?
2. Abstract, Line 37 -- ....cloud droplets underwent a drying process, ... I think it would be more accurate to state that droplets were evaporated.
3. Line 67 – ‘...then these traces are tried to measure higher in the cloud.’ Wording here is incorrect.
4. Line 91 – ‘...to identify seeding material in the residual cloud droplets.’ The seeding material is identified within ‘cloud droplet residuals’; i.e. the aerosol that remains *after* evaporation of the cloud droplets.
5. Line 92 – ‘....hypothesis relies on a chain of microphysical mechanisms.’ The wording here is not correct; there is no such thing as a chain of mechanisms. I think the authors are referring to a chain of events with each event being a specific microphysical process.
6. Line 99 – ‘CCN do.’ (not does, CCN is plural)
7. Line 107 – replace ‘seed’ with ‘seeding agent’ and delete the word ‘the’ before broadening.

8. Sentence on lines 111-113 – I read this sentence in relation to the evolution of microphysical processes resulting from hygroscopic seeding (previous sentence); however, this has been accomplished in glaciogenic seeding experiments as the authors reference French et al. (2018). It seems to me that the processes are *more* dynamic and complex in cold clouds, yet that linkage has been made.
9. Lines 127-129 – isn't all the data presented in this study from 'warm' cloud seeding? Why reference flare racks for 'cold' cloud seeding. And, by 'warm' and 'cold' are the authors referring to hygroscopic vs glaciogenic seeding? If so, they should be referred to as such.
10. Use of abbreviations and nomenclature for height of measurements in cloud— introduced on Lines 146 & 7 – The authors use the nomenclature 'cloud depth' (abbreviated CD) to describe the heights (above cloud base) for measurements throughout the manuscript. I find this confusing as 'cloud depth' normally refers to a measurement of the total depth (or thickness) of a cloud. I suggest the authors should change all instances in text, figures, and tables from 'cloud depth' to 'height above cloud base'.
11. Line 161 – Delete 'As mentioned earlier'
12. Line 165 & 6 "...the CVI inlet segregates and samples cloud elements." Replace that with: 'the CVI inlet cloud hydrometeors with aerodynamic diameters larger than a certain size depending on the rate of the counter flow.
13. Line 168 – 'larger than ( $D > 7 \mu\text{m}$ )' how was this verified for the setup in this experiment? The cutoff size is dependent not only on flow rate, but also aircraft speed, possibly mounting location on the aircraft, altitude, etc. Verifying this (somehow) seems to be a critical thing in this experiment.
14. Line 172 – I cannot access the Golderger et al. (2020) reference.
15. Lines 230 & 231 and Figure 3—Is 'start' and 'stop' the times of 'Pass Begin' and 'Pass End' shown in the figure? If so, be consistent in labeling. Label 'maximum total mass time' in figure 3.
16. Lines 253 through 260 – The authors repeat items that are already discussed earlier and restate the same things multiple times in lines in this paragraph. I think the authors should rewrite this paragraph to make it more concise and less repetitive.
17. Line 285 and 286 reword to: ...'with three cloud passes of the same cloud before and three passes after seeding are shown in Fig 4.'
18. Line 288 – change 'above' to 'compared to'
19. Line 290 – the wording seem awkward here...maybe change 'consist of' to 'containing'
20. Line 291 & 2 – I do not see increased SO<sub>4</sub> concentrations in the seeded clouds (perhaps at mid level, but certainly not at the highest level...
21. Line 307 – 'several cloud passes....were made....before dispersal of seeding material.' From Figure 5a, it looks like one pass was made.
22. Line 311-314 – The AIMMS 20 does not measure whether in cloud, I assume the authors use some threshold on the CDP measurements? Possibly a threshold on the LWC derived from the integrated size distribution?
23. Line 326 – sentence that begins 'Discussions on cloud probes...' ---delete this.
